# Supplementary material for: Age Related Changes in Epilepsy Characteristics and Response to Antiepileptic Treatment in Autism Spectrum Disorders
Source: Preprints.org preprint supplement (doi:10.20944/preprints202306.0784.v1), 2023-06-12
Supplement: Supplementary file 1 [file supplementary]

|  | **All Seizures(N=570)** | | **Generalized (N=315)** | | **Focal (N=253)** | | **Absence (N=266)** | | **LKS (N=24)** | | **Atypical LKS (N=26)** | | **LGS (N=15)** | | **IS (N=29)** | |
| --- | --- | --- | --- | --- | --- | --- | --- | --- | --- | --- | --- | --- | --- | --- | --- | --- |
|  | **Average** | **SEM** | **Average** | **SEM** | **Average** | **SEM** | **Average** | **SEM** | **Average** | **SEM** | **Average** | **SEM** | **Average** | **SEM** | **Average** | **SEM** |
| **Age of seizure onset** | 5.88 | 0.28 | 7.04 | 0.43 | 4.86 | 0.32 | 4.59 | 0.29 | 4.25 | 0.92 | 3.42 | 0.62 | 2.13 | 0.74 | 0.48 | 0.24 |
|  | **N** | **%** | **N** | **%** | **N** | **%** | **N** | **%** | **N** | **%** | **N** | **%** | **N** | **%** | **N** | **%** |
| **Sex** (Male) | 444 | 77.9 | 253 | 80.3 | 186 | 73.5 | 205 | 77.1 | 19 | 79.2 | 22 | 84.6 | 11 | 73.3 | 24 | 82.8 |
| **Diagnosis** | **N** | **%** | **N** | **%** | **N** | **%** | **N** | **%** | **N** | **%** | **N** | **%** | **N** | **%** | **N** | **%** |
| Autism Disorder | 409 | 71.8 | 240 | 76.2 | 180 | 71.1 | 203 | 76.3 | 19 | 79.2 | 19 | 73.1 | 13 | 86.7 | 19 | 65.5 |
| PDD-NOS | 130 | 22.8 | 68 | 21.6 | 60 | 23.7 | 56 | 21.1 | 5 | 20.8 | 7 | 26.9 | 2 | 13.3 | 8 | 27.6 |
| Asperger’s | 59 | 10.4 | 27 | 8.6 | 29 | 11.5 | 22 | 8.2 | 1 | 4.2 | 1 | 3.8 | 0 | 0 | 2 | 6.9 |
| **Comorbidity** | **N** | **%** | **N** | **%** | **N** | **%** | **N** | **%** | **N** | **%** | **N** | **%** | **N** | **%** | **N** | **%** |
| Prematurity | 92 | 16.1 | 38 | 12.1 | 46 | 18.2 | 48 | 18.0 | 3 | 12.5 | 4 | 15.4 | 2 | 13.3 | 7 | 24.1 |
| Cerebral palsy | 29 | 5.1 | 17 | 5.4 | 15 | 5.9 | 13 | 4.9 | 1 | 4.2 | 2 | 7.7 | 0 | 0 | 4 | 13.8 |
| Sensory integration disorder | 275 | 48.2 | 146 | 46.3 | 122 | 48.2 | 141 | 53.0 | 15 | 62.5 | 17 | 65.4 | 8 | 53.3 | 15 | 51.7 |
| ADHD | 159 | 27.9 | 79 | 25.1 | 76 | 30.0 | 88 | 33.1 | 7 | 29.2 | 6 | 23.1 | 2 | 13.3 | 5 | 17.2 |
| Hypotonia | 143 | 25.1 | 77 | 24.4 | 63 | 24.9 | 72 | 27.1 | 4 | 16.7 | 13 | 50.0 | 6 | 40.0 | 9 | 31.0 |
| Mitochondrial disease | 62 | 10.9 | 23 | 7.3 | 32 | 12.6 | 29 | 10.9 | 4 | 16.7 | 7 | 26.9 | 2 | 13.3 | 3 | 10.3 |
| Enteritis | 101 | 17.7 | 50 | 15.9 | 51 | 20.2 | 53 | 19.9 | 3 | 12.5 | 12 | 46.2 | 3 | 20.0 | 5 | 17.2 |
| LNH | 20 | 3.5 | 12 | 3.8 | 12 | 4.7 | 10 | 3.8 | 0 | 0 | 6 | 23.1 | 0 | 0 | 0 | 0 |
| Dysbiosis | 90 | 15.8 | 40 | 12.7 | 39 | 15.4 | 56 | 21.1 | 3 | 12.5 | 9 | 34.6 | 1 | 6.7 | 4 | 13.8 |
| GERD | 130 | 22.8 | 65 | 20.6 | 61 | 24.1 | 58 | 21.8 | 3 | 12.5 | 11 | 42.3 | 6 | 40.0 | 8 | 27.6 |
| Constipation | 245 | 43.0 | 125 | 39.7 | 104 | 41.1 | 127 | 47.7 | 9 | 37.5 | 9 | 34.6 | 7 | 46.7 | 13 | 44.8 |
| Growth failure | 83 | 14.6 | 35 | 11.1 | 45 | 17.8 | 40 | 15.0 | 3 | 12.5 | 6 | 23.1 | 5 | 33.3 | 4 | 13.8 |
| Accelerated growth | 51 | 8.9 | 23 | 7.3 | 17 | 6.7 | 34 | 12.8 | 2 | 8.3 | 1 | 3.8 | 0 | 0 | 0 | 0 |
| Microcephaly | 24 | 4.2 | 9 | 2.9 | 12 | 4.7 | 15 | 5.6 | 0 | 0 | 2 | 7.7 | 2 | 13.3 | 3 | 10.3 |
| Macrocephaly | 66 | 11.6 | 30 | 9.5 | 35 | 13.8 | 29 | 10.9 | 2 | 8.3 | 4 | 15.4 | 2 | 13.3 | 1 | 3.4 |
| Genetic syndromes | 40 | 7.0 | 24 | 7.6 | 21 | 8.3 | 20 | 7.5 | 1 | 4.2 | 1 | 3.8 | 5 | 33.3 | 5 | 17.2 |
| Mental retardation | 151 | 26.4 | 94 | 29.8 | 86 | 34.0 | 73 | 27.4 | 6 | 20.8 | 1 | 3.8 | 10 | 66.7 | 13 | 44.8 |
| Insomnia | 186 | 32.6 | 100 | 31.7 | 84 | 33.2 | 103 | 38.7 | 8 | 33.3 | 10 | 38.5 | 6 | 40.0 | 11 | 37.9 |
| Disturbed sleep maintenance | 267 | 46.8 | 140 | 44.4 | 118 | 46.6 | 137 | 51.5 | 11 | 45.8 | 16 | 61.5 | 8 | 53.3 | 14 | 48.3 |
| Sleep apnea | 54 | 9.5 | 35 | 11.1 | 29 | 11.5 | 25 | 9.4 | 1 | 4.2 | 4 | 15.4 | 4 | 26.7 | 3 | 10.3 |
| Restless leg | 38 | 6.7 | 13 | 4.1 | 15 | 5.9 | 25 | 9.4 | 6 | 25.0 | 3 | 11.5 | 1 | 6.7 | 3 | 10.3 |
| Renal diseases | 11 | 1.9 | 3 | 1.0 | 6 | 2.4 | 7 | 2.6 | 0 | 0 | 1 | 3.8 | 0 | 0 | 2 | 6.9 |
| Cardiovascular diseases | 9 | 1.6 | 6 | 1.9 | 4 | 1.6 | 5 | 1.9 | 0 | 0 | 0 | 0 | 2 | 13.3 | 0 | 0 |
| Hematological diseases | 5 | 0.9 | 0 | 0 | 4 | 1.6 | 1 | 0.4 | 0 | 0 | 1 | 3.8 | 0 | 0 | 0 | 0 |
| **Regression characteristics** | **N** | **%** | **N** | **%** | **N** | **%** | **N** | **%** | **N** | **%** | **N** | **%** | **N** | **%** | **N** | **%** |
| NDR | 158 | 27.7 | 88 | 27.9 | 67 | 26.5 | 66 | 24.8 | 7 | 29.2 | 15 | 57.7 | 4 | 26.7 | 7 | 24.1 |
| Seizure preceding | 57 | 10.0 | 32 | 10.2 | 27 | 10.7 | 23 | 8.6 | 5 | 20.8 | 2 | 7.7 | 2 | 13.3 | 5 | 17.2 |
| Fever preceding | 47 | 8.2 | 29 | 9.2 | 19 | 7.5 | 24 | 9.0 | 2 | 8.3 | 4 | 15.4 | 0 | 0 | 0 | 0 |
| Viral illness preceding | 32 | 5.6 | 19 | 6.0 | 14 | 5.5 | 16 | 6.0 | 0 | 0 | 2 | 7.7 | 2 | 13.3 | 1 | 3.4 |
| Head trauma preceding | 6 | 1.1 | 3 | 1.0 | 4 | 1.6 | 3 | 1.1 | 1 | 4.2 | 0 | 0 | 0 | 0 | 0 | 0 |
|  | **Average** | **SEM** | **Average** | **SEM** | **Average** | **SEM** | **Average** | **SEM** | **Average** | **SEM** | **Average** | **SEM** | **Average** | **SEM** | **Average** | **SEM** |
| Age of initial regression | 2.13 | 0.16 | 2.14 | 0.24 | 2.29 | 0.28 | 2.22 | 0.29 | 1.93 | 0.25 | 1.55 | 0.16 | 2.13 | 0.76 | 0.99 | 0.25 |
| Duration (weeks) | 29.76 | 3.48 | 29.25 | 4.17 | 28.30 | 4.34 | 25.62 | 3.55 | 28.56 | 9.36 | 31.54 | 6.88 | 25.50 | 10.89 | 26.90 | 12.59 |
| Number of regressions | 4.28 | 0.74 | 3.88 | 0.64 | 4.55 | 0.86 | 4.70 | 0.86 | 2.33 | 0.47 | 3.14 | 0.42 | 5.50 | 2.73 | 2.57 | 0.57 |
| Seizure refractoriness | **N** | **%** | **N** | **%** | **N** | **%** | **N** | **%** | **N** | **%** | **N** | **%** | **N** | **%** | **N** | **%** |
| Seizure resolved | 471 | 82.6 | 269 | 85.4 | 227 | 89.7 | 223 | 83.8 | 21 | 87.5 | 19 | 73.1 | 14 | 93.3 | 22 | 75.9 |
|  | **Average** | **SEM** | **Average** | **SEM** | **Average** | **SEM** | **Average** | **SEM** | **Average** | **SEM** | **Average** | **SEM** | **Average** | **SEM** | **Average** | **SEM** |
| Duration in years | 3.68 | 0.44 | 4.01 | 0.66 | 4.63 | 1.10 | 5.16 | 0.84 | 3.60 | 1.07 | 7.13 | 2.08 | 2.50 | - | 7.09 | 2.14 |
| Frequency (best) (weeks) | 1.50 | 0.13 | 1.03 | 0.14 | 1.55 | 0.19 | 2.05 | 0.22 | 3.06 | 0.91 | 2.19 | 0.67 | 4.61 | 1.35 | 1.91 | 0.66 |
| Frequency (worst) (weeks) | 5.70 | 0.20 | 4.96 | 0.26 | 6.51 | 0.28 | 6.96 | 0.28 | 8.50 | 0.69 | 6.80 | 0.91 | 10.50 | 0 | 9.42 | 0.53 |
